# Supplementary material for: Study of anisotropic thermal conductivity in textured thermoelectric alloys by Raman spectroscopy
Source: Royal Society of Chemistry journal article supplement (doi:10.1039/d1ra04886d), 2021-01-01
Supplement: d1ra04886d1.pdf [file d1ra04886d1.pdf]

## Supplementary Data

# Study of Anisotropic Thermal conductivity in Textured Thermoelectric Alloys by Raman Spectra

Rapaka S C Bose, and K Ramesh\*

Figure S1

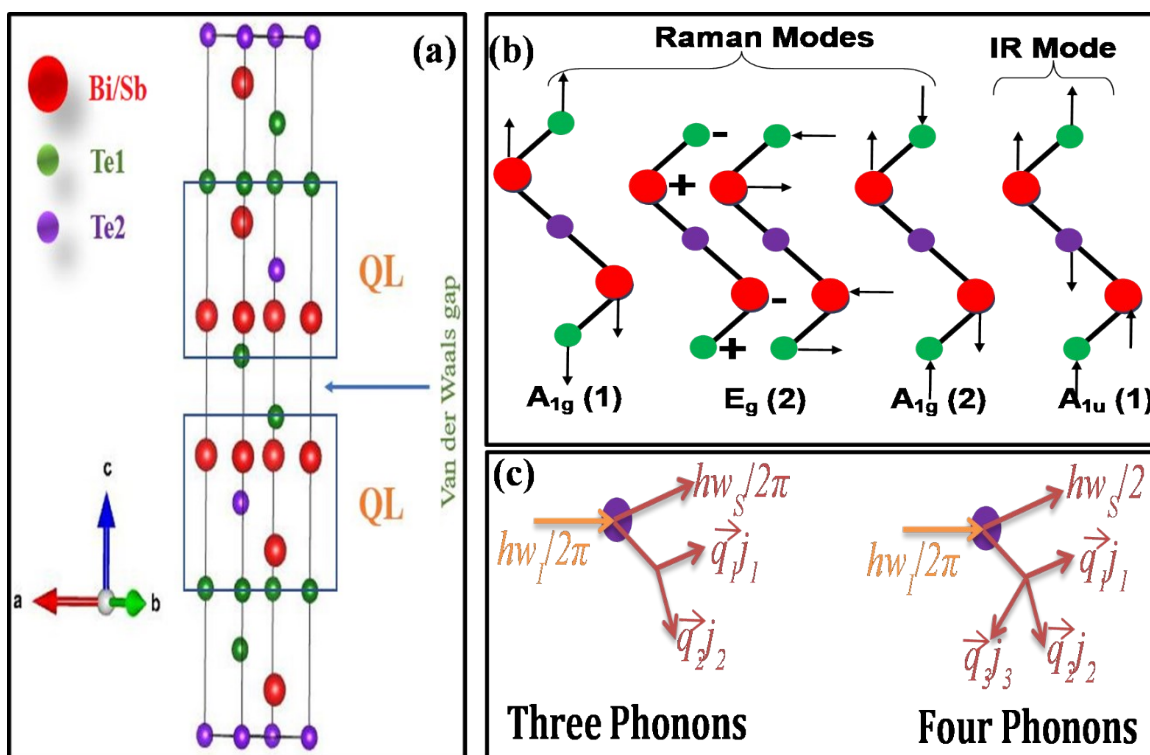

**Fig. S1.** (a) Crystal structure of  $\text{Bi}_2\text{Te}_3/\text{Sb}_2\text{Te}_3$ , (b) Schematic representation of Raman active modes, and (c) Schematic representation of the three-phonon and the four phonon decay processes.

**Figure S2**

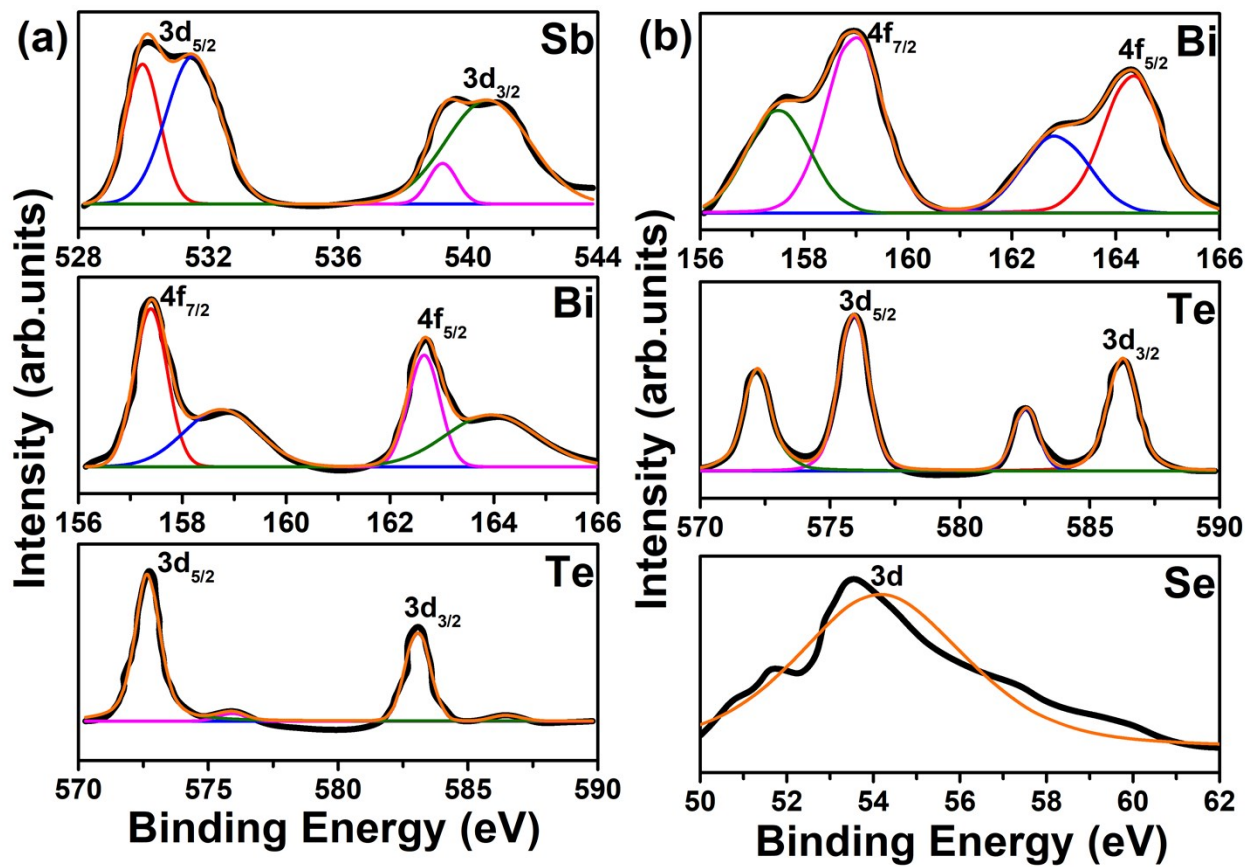

**Fig. S2.** XPS spectra of (a) *p*-type SBT (Sb  $3d$ , Bi  $4f$ , & Te  $3d$ ) and (b) *n*-type BTS (Bi  $4f$ , Te  $3d$ , & Se  $3d$ ).

**Figure S3**

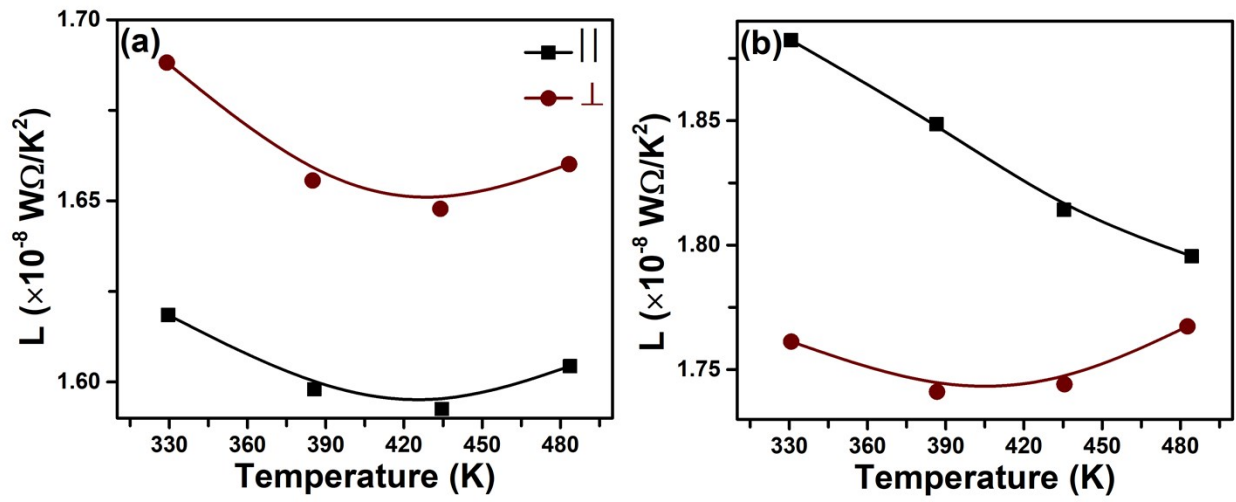

**Fig. S3.** Temperature dependent Lorenz number of (a)  $p$ -type SBT and (b)  $n$ -type BTS.

**Figure S4**

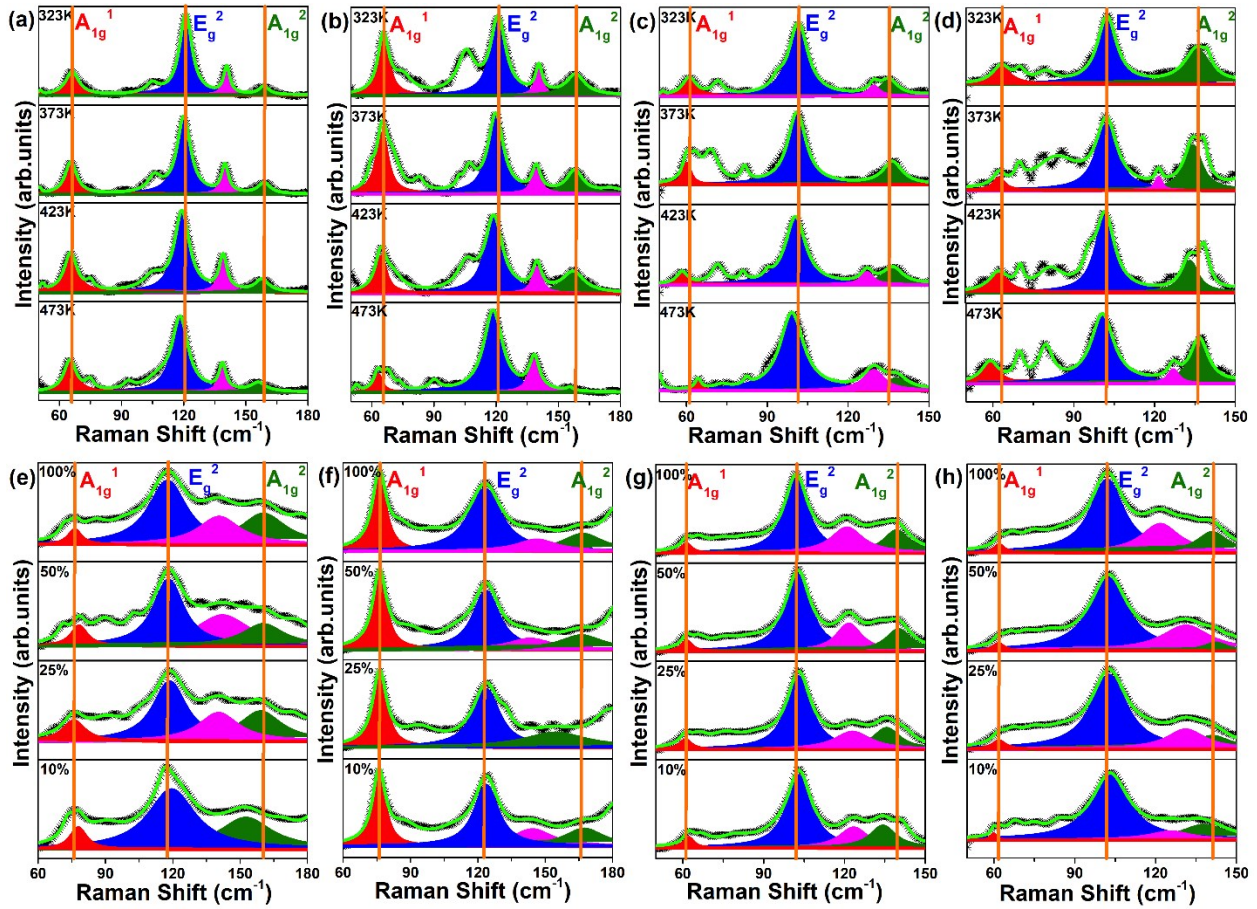

**Fig. S4.** Temperature dependent Raman spectra **(a)** Parallel direction, & **(b)** Perpendicular direction to the pressing axis; Laser power dependent **(c)** Parallel direction, & **(d)** Perpendicular direction to the pressing axis of *p*-type SBT; and Temperature dependent Raman spectra **(e)** Parallel direction, & **(f)** Perpendicular direction to the pressing axis; Laser power dependent **(g)** Parallel direction, & **(h)** Perpendicular direction to the pressing axis of *n*-type BTS.

**Figure S5**

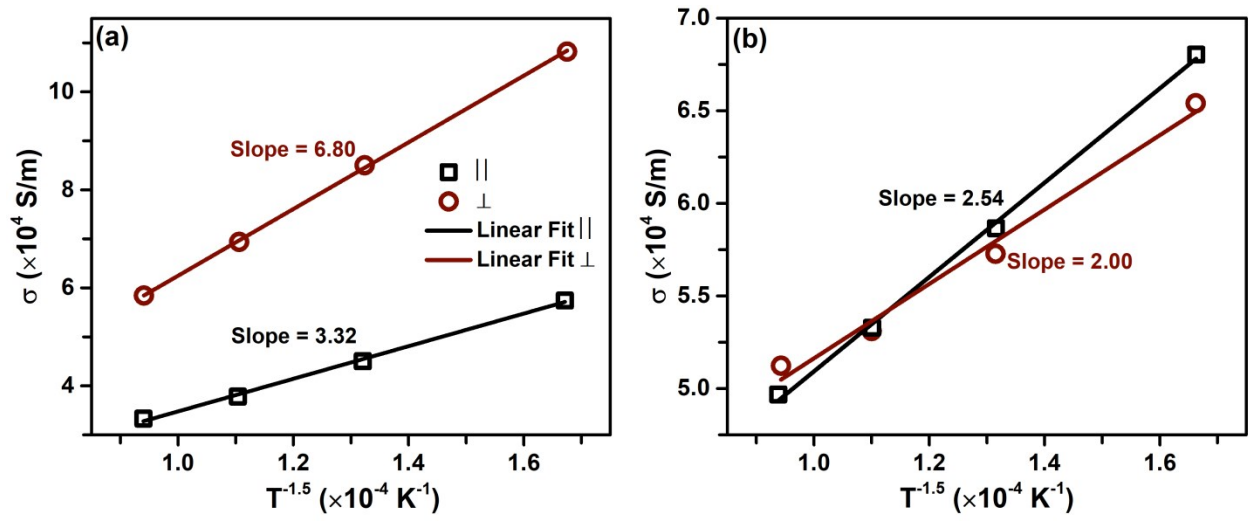

**Fig. S5.** Linear plot between  $\sigma$  and  $T^{-1.5}$  of (a) *p*-type SBT and (b) *n*-type BTS.

**Figure S6**

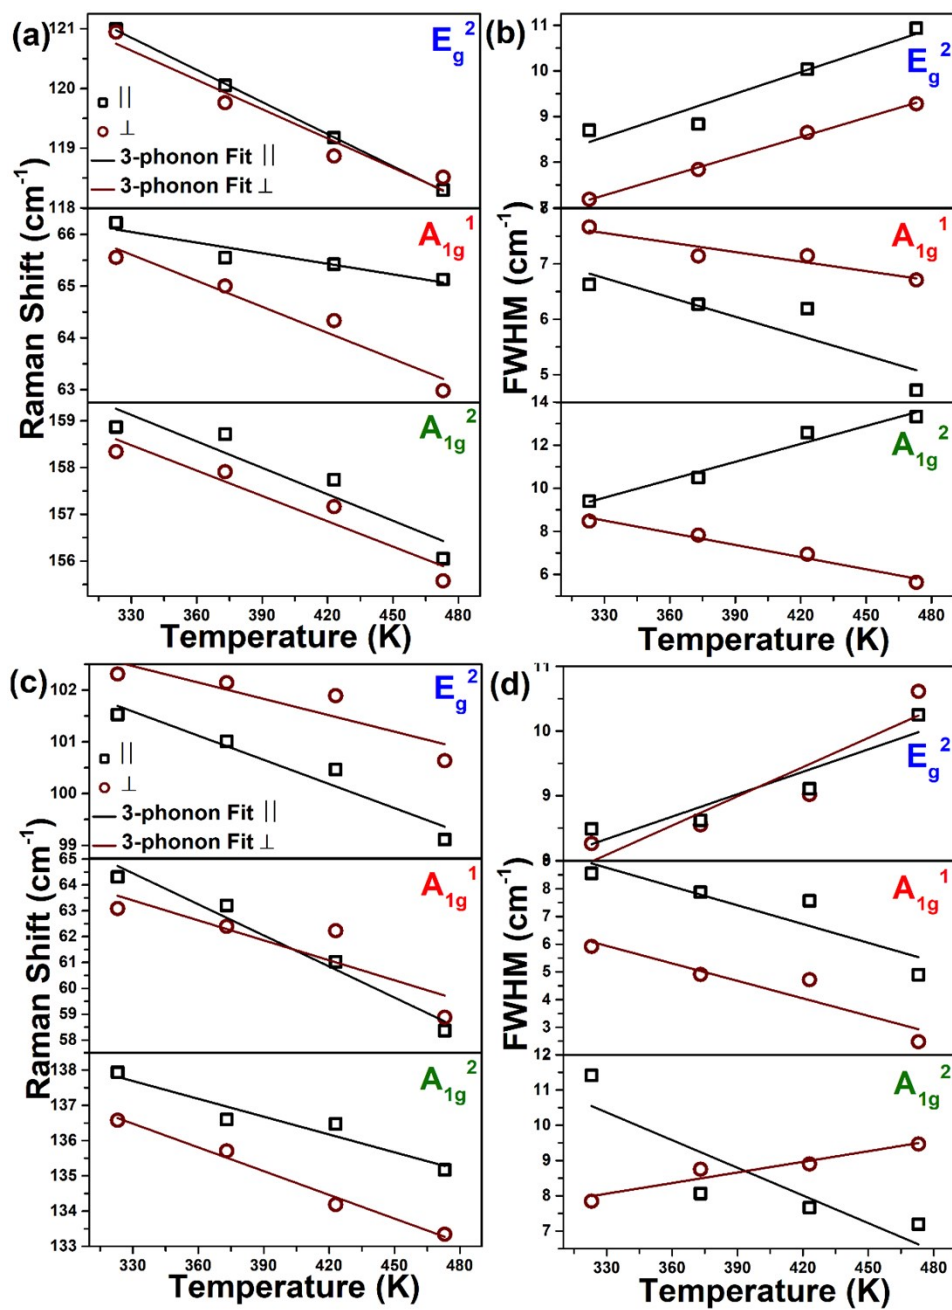

**Fig. S6.** Temperature dependent (a) Raman peak positions, & (b) FWHM of *p*-type SBT; and Temperature dependent (c) Raman peak positions, & (d) FWHM of *n*-type BTS.



**Figure S7**

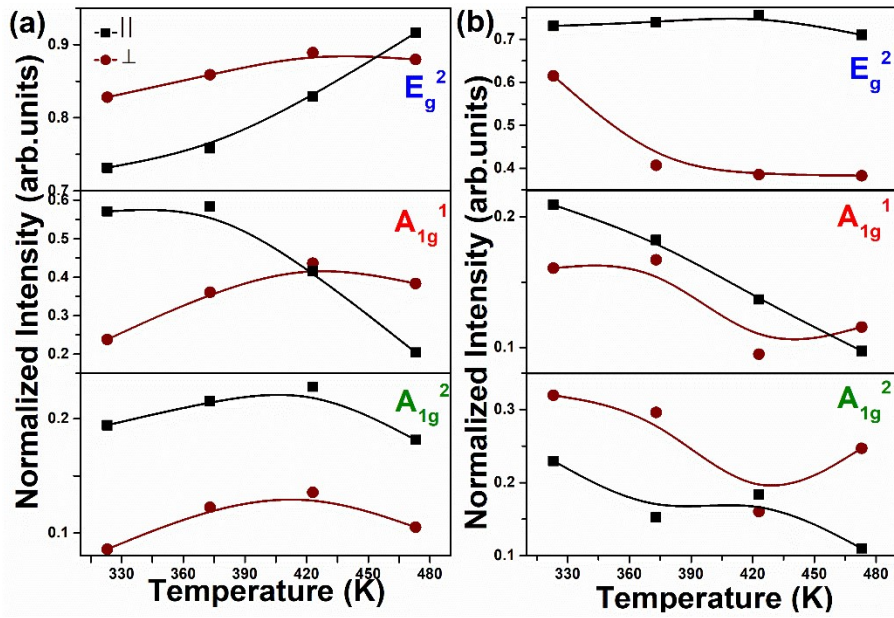

**Fig. S7.** Temperature dependent mode wise intensity of (a) *p*-type SBT, and (b) *n*-type BTS.

**Table S1**

**Table S1.** Raman active peaks of *p*-type SBT and *n*-type BTS in both directions: parallel and perpendicular to the pressing axis.

|            | <i>p</i> -type SBT |                      | <i>n</i> -type BTS |                      |
|------------|--------------------|----------------------|--------------------|----------------------|
|            | Parallel<br>(  )   | Perpendicular<br>(⊥) | Parallel<br>(  )   | Perpendicular<br>(⊥) |
| $E_g^2$    | ~117.69            | ~123.14              | ~102.05            | ~101.98              |
| $A_{1g}^1$ | ~76.35             | ~76.07               | ~61.34             | ~61.92               |
| $A_{1g}^2$ | ~160.33            | ~166.65              | ~139.33            | ~141.02              |
